# Supplementary material for: Non-glycosylated IGF2 prohormones are more mitogenic than native IGF2
Source: PubMed Central journal article supplement (PMC10439913; doi:10.1038/s42003-023-05239-6), 2023-08-19
Supplement: 42003_2023_5239_MOESM3_ESM.pdf [file 42003_2023_5239_MOESM3_ESM.pdf]

## **Description of Additional Supplementary Files**

**File name:** Supplementary Data 1

**Description:** The source data behind the graphs in the paper
